# Supplementary material for: Synergistic effect of pretreatment with dimethyl sulfoxide and an ionic liquid on enzymatic digestibility of white poplar and pine
Source: Royal Society of Chemistry journal article supplement (doi:10.1039/c6ra14206k), 2016-01-01
Supplement: c6ra14206k1.pdf [file c6ra14206k1.pdf]

## Synergistic Effect of Pretreatment with Dimethyl Sulfoxide and an Ionic Liquid on Enzymatic Digestibility of White Poplar and Pine

Xin Zhang<sup>‡</sup>, Wenwen Zhao<sup>‡</sup>, Yujie Li, Chi Li, Qipeng Yuan and Gang Cheng\*

College of Life Science and Technology, Beijing University of Chemical Technology,  
Beijing, China, 100029

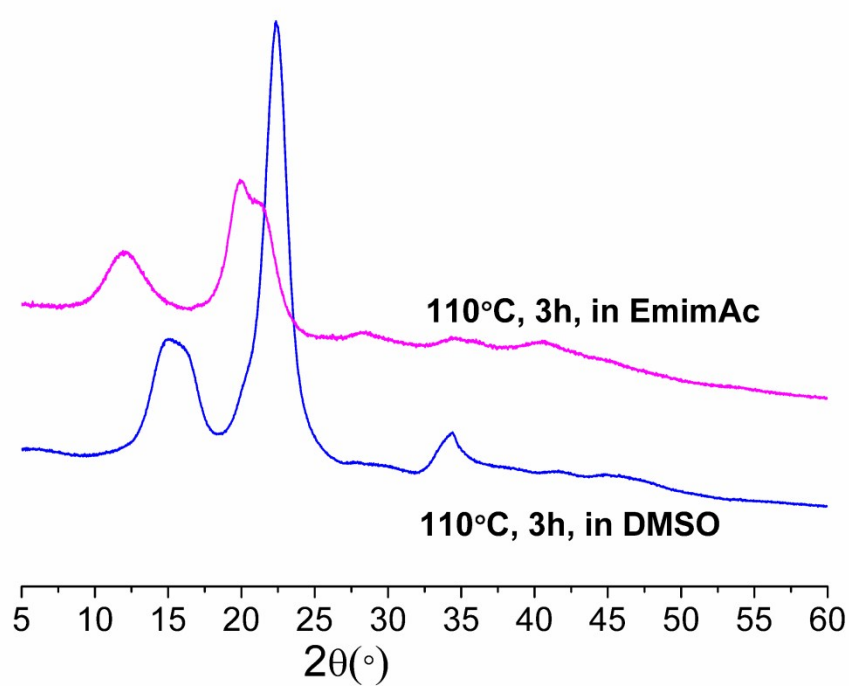

XRD data of pure cellulose pretreated in EmimAc and DMSO at 110°C for 3h.
